# Supplementary material
Source: Springer Nature journal article supplement (https://www.springermedizin.de/resource/supplementary/12889_2009_1787_MOESM1_ESM.pdf/9504004)
Supplement: MOESM1 [file 9504004]

Total Women enrolled  
in the study = 420

Total Women enrolled  
in Manzoor Colony =  
155

Total Women enrolled  
in Qayoomabad =  
265

Lost to follow-up

Shifted = 57

Refused = 4

Lost to follow-up

Shifted = 78

Refused = 14

Total Women  
followed for one year  
or more = 94

Total Women  
followed for one year  
or more = 173
